# Supplementary material
Source: publisher figshare collection journal article supplement (https://frontiersin.figshare.com/ndownloader/files/26050937)
Supplement: Supplementary file [file 26050937]

## Supplementary file

**Table S1.** The data of survival studies for the nude mice bearing U87 tumor cells

| Days | Group A | Group B | Group C |
|------|---------|---------|---------|
| 33   | 1       |         |         |
| 33   | 1       |         |         |
| 34   | 1       |         |         |
| 35   | 1       |         |         |
| 35   | 1       |         |         |
| 38   | 1       |         |         |
| 38   | 1       |         |         |
| 40   | 1       |         |         |
| 43   | 1       |         |         |
| 47   | 1       |         |         |
| 35   |         | 1       |         |
| 35   |         | 1       |         |
| 43   |         | 1       |         |
| 45   |         | 1       |         |
| 46   |         | 1       |         |
| 47   |         | 1       |         |
| 51   |         | 1       |         |
| 54   |         | 1       |         |
| 62   |         | 1       |         |
| 54   |         |         | 1       |
| 54   |         |         | 1       |
| 56   |         |         | 1       |
| 56   |         |         | 1       |
| 59   |         |         | 1       |
| 59   |         |         | 1       |
| 62   |         |         | 1       |
| 62   |         |         | 1       |
| 63   |         |         | 1       |

Days: The died days of the nude mice after tumor implantation

Group A: Vehicle control

Group B: OTSSP167 Dose 1 (5  $\mu$ L of 1  $\mu$ M OTSSP167 in 1% DMSO in PBS per mouse)

Group C: OTSSP167 Dose 2 (5  $\mu$ L of 2  $\mu$ M OTSSP167 in 1% DMSO in PBS per mouse)

1 represents the number of died mouse

**Table S2.** The data of survival studies for the nude mice bearing GSC1 tumor cells

| Days | Group A | Group B | Group C |
|------|---------|---------|---------|
| 30   | 1       |         |         |
| 32   | 1       |         |         |
| 35   | 1       |         |         |
| 35   | 1       |         |         |
| 37   | 1       |         |         |
| 38   | 1       |         |         |
| 39   | 1       |         |         |
| 42   | 1       |         |         |
| 42   | 1       |         |         |
| 44   | 1       |         |         |
| 35   |         | 1       |         |
| 38   |         | 1       |         |
| 38   |         | 1       |         |
| 40   |         | 1       |         |
| 44   |         | 1       |         |
| 46   |         | 1       |         |
| 48   |         | 1       |         |
| 52   |         | 0       |         |
| 55   |         | 0       |         |
| 39   |         |         | 1       |
| 44   |         |         | 1       |
| 47   |         |         | 1       |
| 50   |         |         | 1       |
| 50   |         |         | 1       |
| 52   |         |         | 0       |
| 55   |         |         | 0       |
| 55   |         |         | 0       |
| 55   |         |         | 0       |

Days: The died days of the nude mice after tumor implantation

Group A: Vehicle control

Group B: OTSSP167 Dose 1 (5  $\mu$ L of 1  $\mu$ M OTSSP167 in 1% DMSO in PBS per mouse)

Group C: OTSSP167 Dose 2 (5  $\mu$ L of 2  $\mu$ M OTSSP167 in 1% DMSO in PBS per mouse)

1 represents the number of died mouse

0 means the mouse is not dead

All the mice were treated with OTSSP167 or vehicle control by intratumoral injection once a week for 4 weeks.

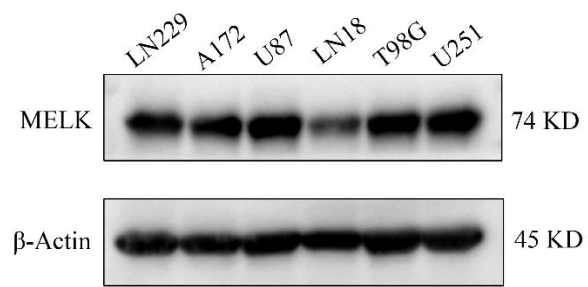

**Figure S1. Expression levels of MELK in different GBM cell lines.** Immunoblot analysis of MELK in LN229, A172, U87, LN18, T98G and U251 cells.  $\beta$ -Actin as a loading control.
